# Supplementary material for: The Initial Response to COVID-19 Disruptions for Older People with HIV in Ukraine
Source: Geriatrics (Basel). 2022 Dec 6;7(6):138. doi: 10.3390/geriatrics7060138 (PMC9777936; doi:10.3390/geriatrics7060138)
Supplement: Supplementary file 1 [file geriatrics-07-00138-s001.zip › geriatrics-2018064-supplementary.pdf]

## Supplementary Tables

**Supplementary Table S1.** Analysis variable dictionary

| <b>General Characteristics</b>                 |                                                                                                                                                                                                                                                                          |
|------------------------------------------------|--------------------------------------------------------------------------------------------------------------------------------------------------------------------------------------------------------------------------------------------------------------------------|
| <b>Gender</b>                                  | Categorical: Women, Men, Transgender                                                                                                                                                                                                                                     |
| <b>Age</b>                                     | Continuous                                                                                                                                                                                                                                                               |
| <b>Household</b>                               | Categorical: Living alone, living with a partner, living with family members, other                                                                                                                                                                                      |
| <b>Education</b>                               | Categorical: Did not complete high school, completed high school, attended technical school, attended higher education, completed a degree in higher education                                                                                                           |
| <b>Smartphone Ownership</b>                    | Binary variable regarding smartphone ownership.                                                                                                                                                                                                                          |
| <b>COVID-19</b>                                |                                                                                                                                                                                                                                                                          |
| <b>Self-Isolation</b>                          | Categorical: Yes, by myself; Yes, with a partner or family member; Not isolating                                                                                                                                                                                         |
| <b>Covid-19 Exposure</b>                       | 1. Binary: Direct Exposure with a known Covid-19 positive individual<br>2. Binary: Family member or friend with known Covid-19                                                                                                                                           |
| <b>Specific Stressors during lockdown</b>      | Participants were asked about 20 specific stressors during lockdown, with responses classified as yes or no.                                                                                                                                                             |
| <b>Total Stressors</b>                         | Continuous: Total Number of Stressors (Max 20). Mean and standard deviation were calculated.                                                                                                                                                                             |
| <b>Economic Worry</b>                          | Binary: Yes, if a participant reported any sign of economic worry (job loss, price inflation, limited savings, buying food or other necessities)                                                                                                                         |
| <b>HIV Care</b>                                |                                                                                                                                                                                                                                                                          |
| <b>Disclosure</b>                              | Binary: Patient has disclosed HIV status to someone                                                                                                                                                                                                                      |
| <b>HIV Care prior to Covid-19</b>              | 1. Binary: Patient is registered at an AIDS Center<br>2. Binary: Patient has ever been prescribed ART<br>3. Patient is currently prescribed ART                                                                                                                          |
| <b>ART Adherence</b>                           | Binary: Participants were asked during how many days in the past week they took ART medication. Patients classified as adherent if they reported missing no doses in last 7 days                                                                                         |
| <b>HIV support</b>                             | Binary: Patient reports that they have someone who supports HIV treatment (i.e. provides reminders about medication)                                                                                                                                                     |
| <b>HIV support preferences</b>                 | Patients were asked preferences regarding characteristics of those providing HIV care support, including if they preferred individuals with the same HIV status, of a similar age, of the same gender, of the same sexual orientation, and those with medical expertise. |
| <b>Willingness to provide HIV peer support</b> | Binary: Patients reported yes/no if interested in providing peer support to OPWH.                                                                                                                                                                                        |
| <b>Drug and Alcohol Use</b>                    |                                                                                                                                                                                                                                                                          |
| <b>Drug Use</b>                                | Binary: Any reported illicit drug use during Covid-19 lockdown                                                                                                                                                                                                           |
| <b>Addiction</b>                               | Binary: Patient either self-reported a diagnosis of a substance use disorder or an alcohol use disorder OR the patient was recruited as a patient of an addiction treatment clinic                                                                                       |
| <b>Alcohol Use (AUDIT-C)</b>                   | AUDIT-C: Lower risk drinking (Score <3); Higher risk drinking (Scores ≥ 3)<br>Validation: Bradley et al., 2007; Frank et al., 2008.                                                                                                                                      |
| <b>Psychosocial</b>                            |                                                                                                                                                                                                                                                                          |

|                         |                                                                                                                                                                                                                                                            |
|-------------------------|------------------------------------------------------------------------------------------------------------------------------------------------------------------------------------------------------------------------------------------------------------|
| <b>Social Support</b>   | Patients self-report on the number of individuals they felt like they could trust and turn to for help.                                                                                                                                                    |
| <b>Resilience (BRS)</b> | Categorical: The possible score range of the BRS range from 1 to 5. Scores less than 3 classified low resilience, scores between 3 and 4.3 classified normal resilience, and scores between 4.31 and 5 classified higher resilience. (Smith et al., 2018). |

#### Chronic Conditions

|                             |                                                                                                                                                                                                                                                                                                                                   |
|-----------------------------|-----------------------------------------------------------------------------------------------------------------------------------------------------------------------------------------------------------------------------------------------------------------------------------------------------------------------------------|
| <b>Health</b>               | Binary: Patient has a chronic condition in addition to HIV, including kidney disease, diabetes, heart disease.                                                                                                                                                                                                                    |
| <b>Care during Covid-19</b> | Regarding chronic conditions care, patients were asked the following yes/no questions:<br>1. Have you had changes to your care routine<br>2. Are you worried about medication shortage<br>3. Have you stopped care due to financial problems<br>4. Can you no longer visit your physician                                         |
| <b>Medication Adherence</b> | Binary: Patients were asked if they had taken all of their pills, most of their pills, about half of their pills, almost none, or none of their pills during the last 7 days. Patients were then categorized in analysis as either taking less than half of pills OR all of most pills. To note: no patients reported about half. |

**Supplementary Table S2.** Full Bivariate and Multivariable Modeling: Correlates of depressive symptoms

| General Characteristics       |                                                                 | Bivariate<br>OR (95% CI) | Multivariable<br>aOR (95% CI) | p-value |
|-------------------------------|-----------------------------------------------------------------|--------------------------|-------------------------------|---------|
| Sex                           | Female                                                          | 2.59 (1.27 – 5.40)       | 2.83 (1.19 – 7.05)            | 0.018   |
|                               | Male                                                            | Ref                      | Ref                           |         |
| Age                           | Age of participant                                              | 0.97 (0.91 – 1.02)       | 0.96 (0.89 – 1.03)            | 0.266   |
|                               | Completed High School                                           | Ref                      |                               |         |
| Education                     | Attended Vocational Secondary School                            | 0.14 (0.01 – 1.48)       |                               |         |
|                               | Some Higher Education                                           | 0.14 (0.01 – 2.03)       |                               |         |
|                               | Completed Higher Education                                      | 0.08 (0.01 – 0.86)       |                               |         |
| Smartphone                    | Owns a smartphone                                               | 1.00 (0.43 – 2.23)       |                               |         |
| Health                        | Chronic condition in addition to HIV                            | 0.97 (0.45 – 2.11)       |                               |         |
| Response to COVID-19 Lockdown |                                                                 |                          |                               |         |
| Self-Isolation                | Yes, by myself                                                  | Ref                      |                               |         |
|                               | Yes, with a partner/spouse/family member                        | 0.96 (0.41 – 2.29)       |                               |         |
|                               | No                                                              | 0.57 (0.22 – 1.49)       |                               |         |
| Covid-19 Exposure             | Direct Exposure                                                 | 2.03 (0.26 – 22.71)      |                               |         |
|                               | Family member or friend with COVID-19                           | 1.46 (0.44 – 5.05)       |                               |         |
| Total Stressors               | Total # of COVID-19 and lockdown related stressors              | 1.35 (1.11 – 1.69)       | 0.93 (0.64 – 1.34)            | 0.686   |
| HIV Treatment Stress          | Patient reports concerns about possible disruptions in HIV care | 11.21<br>(2.53 – 105.86) | 8.90<br>(1.31 – 104.94)       | 0.024   |
| Economic Stress               | Reported loss of income since start of lockdown                 | 1.61 (0.58 – 4.66)       |                               |         |
| HIV Care                      |                                                                 |                          |                               |         |
| Disclosure                    | Patient has disclosed HIV status                                | 1.16 (0.53 – 2.55)       |                               | 0.054   |
| Care prior to COVID-19        | Patient registered at an AIDS Center                            | 0.49 (0.04 – 3.81)       |                               |         |
|                               | Patient has been prescribed ART ever                            | 1.54 (0.32 – 9.15)       |                               |         |
|                               | Patient is currently prescribed ART                             | 1.54 (0.33 – 9.15)       |                               |         |
| ART Adherence                 | Patient has NOT missed a dose of ART in past 7 days             | 0.63 (0.11 – 2.97)       |                               |         |
| HIV support                   | Someone supports patient’s HIV treatment                        | 2.87 (1.38 – 6.13)       | 2.40 (0.99 – 6.00)            |         |
| Volunteer Interest            | Patient is willing to provide peer support                      | 1.54 (0.75 – 3.19)       |                               |         |
| Drug and Alcohol Use          |                                                                 |                          |                               |         |
| Drug Use                      | Illicit drug use during COVID-19 lockdown                       | 20.45 (2.40 – 2677.81)   | 34.53 (3.02 – 4885.85)        | 0.002   |
| Addiction                     | Diagnosis of substance use and/or alcohol use disorder          | 1.64 (0.72 – 3.81)       |                               |         |
| Alcohol Use Disorder          | No                                                              | Ref                      |                               |         |
|                               | Yes                                                             | 2.37 (0.64 – 10.38)      |                               |         |
| Psychosocial                  |                                                                 |                          |                               |         |
| Social Support                | ≤1 social supports                                              | 0.65 (0.25 – 1.62)       |                               | 0.156   |
| Resilience                    | Low level of resilience                                         | 2.32 (1.11 – 4.96)       | 1.97 (0.77 – 5.04)            |         |
|                               | Normal level of resilience                                      | Ref                      | Ref                           |         |

Abbreviations: aOR = adjusted odds ratio, ART=antiretroviral therapy, SD=standard deviation

**Supplementary Table S3.** Full Bivariate and Multivariable Modeling: Correlates of having Generalized Anxiety Disorder

| General Characteristics       |                                                                 | Bivariate<br>OR (95% CI) | Multivariable<br>aOR (95% CI) | p-value |
|-------------------------------|-----------------------------------------------------------------|--------------------------|-------------------------------|---------|
| <b>Sex</b>                    | Female                                                          | 4.93 (2.25 – 11.47)      | 5.30 (2.16 – 14.30)           | <0.001  |
|                               | Male                                                            | Ref                      | Ref                           |         |
| <b>Age</b>                    | Age of participant                                              | 1.03 (0.97 – 1.08)       | 1.02 (0.95 – 1.09)            | 0.537   |
|                               | Completed High School                                           | Ref                      |                               |         |
| <b>Education</b>              | Attended Vocational Secondary School                            | 0.89 (0.11 – 10.16)      |                               | --      |
|                               | Some Higher Education                                           | 0.49 (0.04 – 7.21)       |                               |         |
|                               | Completed Higher Education                                      | 1.10 (0.13 – 12.86)      |                               |         |
| <b>Smartphone Health</b>      | Owns a smartphone                                               | 1.30 (0.57 – 3.12)       |                               |         |
|                               | Chronic condition in addition to HIV                            | 1.16 (0.52 – 2.65)       |                               |         |
| <b>Self-Isolation</b>         | Yes, by myself                                                  | Ref                      | Ref                           | 0.503   |
|                               | Yes, with a partner/spouse/family member                        | 0.92 (0.39 – 2.22)       | 0.92 (0.33 – 2.53)            |         |
|                               | No                                                              | 0.27 (0.08 – 0.78)       | 0.64 (0.18 – 2.25)            |         |
| <b>Covid-19 Exposure</b>      | Direct Exposure                                                 | 1.11 (0.10 – 8.60)       |                               |         |
|                               | Family member or friend with Covid-19                           | 0.74 (0.17 – 2.55)       |                               |         |
| <b>Total Stressors</b>        | Total # of COVID-19 and lockdown related stressors              | 1.27 (1.04 – 1.56)       | 1.02 (0.79 – 1.30)            | 0.877   |
| <b>HIV Treatment Stress</b>   | Patient reports concerns about possible disruptions in HIV care | 3.07 (1.44 – 6.69)       | 5.33 (1.22 – 28.45)           | 0.023   |
| <b>Economic Stress</b>        | Reported loss of income since start of lockdown                 | 1.55 (0.53 – 4.36)       |                               |         |
| <b>Disclosure</b>             | Patient has disclosed HIV status                                | 1.47 (0.65 – 3.49)       |                               |         |
|                               | Patient registered at an AIDS Center                            | 0.31 (0.03 – 2.43)       |                               |         |
| <b>Care prior to Covid-19</b> | Patient has been prescribed ART ever                            | 0.52 (0.11 – 2.57)       |                               |         |
|                               | Patient is currently prescribed ART                             | 1.61 (0.29 – 16.49)      |                               |         |
| <b>ART Adherence</b>          | Patient has NOT missed a dose of ART in past 7d                 | 0.63 (0.11 – 2.97)       |                               |         |
| <b>HIV support</b>            | Has someone to help support patient with their HIV treatment    | 3.07 (1.44 – 6.69)       | 2.68 (1.07 – 6.95)            | 0.020   |
| <b>Volunteer Interest</b>     | Patient is willing to provide peer support                      | 1.30 (0.62 – 2.79)       |                               |         |
| <b>Drug Use</b>               | Illicit drug use during Covid-19 lockdown                       | 2.52 (0.59 – 11.78)      |                               |         |
| <b>Addiction</b>              | Diagnosis of substance use and/or alcohol use disorder          | 0.99 (0.41 – 2.31)       |                               |         |
| <b>Alcohol Use Disorder</b>   | No                                                              | Ref                      |                               |         |
|                               | Yes                                                             | 1.56 (0.40 – 5.83)       |                               |         |
| <b>Social Support</b>         | ≤1 social supports                                              | 0.87 (0.32 – 2.22)       |                               |         |
| <b>Resilience</b>             | Low level of resilience                                         | 2.34 (1.09 – 5.05)       | 1.91 (0.80 – 4.63)            | 0.134   |
|                               | Normal level of resilience                                      | Ref                      | Ref                           |         |

**Supplementary Table S4.** Stressors reported by OPWH during first COVID-19 Lockdown in Kyiv

| <b>Specific Stressors during lockdown</b>     | <b>n (%)</b> |
|-----------------------------------------------|--------------|
| Fear of getting infected with coronavirus     | 54 (43.9%)   |
| Movement restriction                          | 46 (37.4%)   |
| No or few savings                             | 35 (28.5%)   |
| Inflation, rising prices for things           | 33 (26.8%)   |
| Change of everyday social life                | 30 (24.4%)   |
| Loved ones' health                            | 23 (18.7%)   |
| Receiving necessary healthcare services       | 20 (16.3%)   |
| Barriers to treatment for a chronic condition | 18 (14.6%)   |
| Unemployment                                  | 16 (13.0%)   |
| Barriers to HIV treatment                     | 12 (9.8%)    |
| Buying food, medicines, & other necessities   | 6 (4.9%)     |
| Surveillance by authorities                   | 5 (4.1%)     |

**Supplementary Table S5.** Peer Support Preferences of OPWH in Kyiv

| <b>Desired Characteristic</b>         | <b>n (%)</b> |
|---------------------------------------|--------------|
| HIV positive                          | 59 (48.0%)   |
| Concordant gender                     | 14 (11.4%)   |
| Similar age                           | 7 (5.7%)     |
| Concordant sexual orientation         | 4 (3.3%)     |
| Expertise in medicine                 | 53 (43.1%)   |
| <b>Willingness to provide Support</b> |              |
| Yes                                   | 72 (58.5%)   |
| No                                    | 51 (41.55%)  |
